# Supplementary material for: Identifying uncertainties in simulated streamflow from hydrologic model components for climate change impact assessments
Source: Copernicus journal article supplement (doi:10.5194/hess-2019-328), 2019-07-03
Supplement: Supplementary file [file hess-2019-328-AC1-supplement.pdf]

### General Comments (overall quality of paper):

Overall, I think the paper was well written as a climate impacts assessment and application of uncertainty methods provided elsewhere. As stated in the Introduction, the goals of the paper were threefold:

1) Compare different hydrologic models 2) Quantify uncertainty associated with different modeling choices 3) Provide suggestions for studies looking at impacts of climate change

The paper accomplished these three goals (aside for one point which I address in the paragraph below). However, the authors don't make it clear how the field is moved forward even if all three goals are achieved. The authors' study appears to be similar to the Vetter et al (2015) study but in a different, and more homogeneous, domain. As-is, the authors conducted a very detailed assessment of climate change impacts on streamflow in Santa Barbara County. Their assignment of uncertainty to different modeling components followed methods similar to those in previous studies like Addor et al (2014), Vetter et al (2015), Hattermann et al (2018), Chegwiddden et al (2019). I did not see any truly novel methods proposed, thus making the paper seem more like an, albeit very rigorous, report. As is, the study is appropriate for a climate impacts assessment journal, but the findings are insufficiently new to warrant publication in HESS.

To make the manuscript more relevant to HESS, I suggest a handful of other potential additions to deepen the analysis. Would it be possible to expand the analyses conducted here to other domains and thus do an intercomparison across different regions? For example, the findings in Figures 5 through 7 are relatively uniform across region and metric. Perhaps the authors could probe deeper into those comparisons by conducting more analyses in other regions or with other metrics? By expanding the analysis to other regions and metrics the study could test how sensitive the uncertainty analysis is to the research question of interest.

**Response:** To deepen this study, we have expanded the analysis by adding metrics about the volume and composite of runoff (i.e., monthly surface, subsurface and total runoff), as well as the hydrologic seasonality (wet season length and timing of wet season onset), considering these quantities are of great importance for the study region (Myers et al., 2019;Feng et al., 2019).

We have added associated texts and figures in the manuscript:

*"...Previous studies (e.g., Feng et al., 2019) showed that the intensified storm events concentrated in a shorter and delayed wet season in SBC under future climate conditions will cause significant increase in discharge, especially the extremes (e.g., 100-yr discharge). The climate change impacts on the path and quantity of surface/subsurface runoff and discharge will impact the soil erosion, sediment/nutrients transport and subsequently affect the coastal ecosystems (Myers et al., 2019) Feng et al., 2019). The longer dry season may also contribute to the increased occurrence of droughts and wildfires (Myers et al., 2019). Therefore, the changes in these hydrologic variables (e.g., runoff, discharge and seasonality) under future climate conditions and associated uncertainties are essential to assess the vulnerability of coastal region in CA and make adaptation strategies to accommodate climate change. In this study, we simulated future hydrologic variables using three hydrologic models forced with climate outputs from 10 GCMs that were selected for their good performance in representing historical meteorological characteristics in the study region, under 2 emission scenarios (RCP 4.5 and*

RCP 8.5) (Feng et al., 2019). The main objectives of this study are to: (1) evaluate and compare the performance of hydrologic models with different approaches representing runoff generation process using a consistent modeling framework; (2) quantify the relative contributions of different sources (including hydrologic process models, parameterizations, GCM forcings and emission scenarios) to the total uncertainty in simulated surface/subsurface runoff, streamflow, and seasonality; and (3) provide actionable information and suggestions for studies and practices associated with hydrologic impacts of climate change in the study region.”

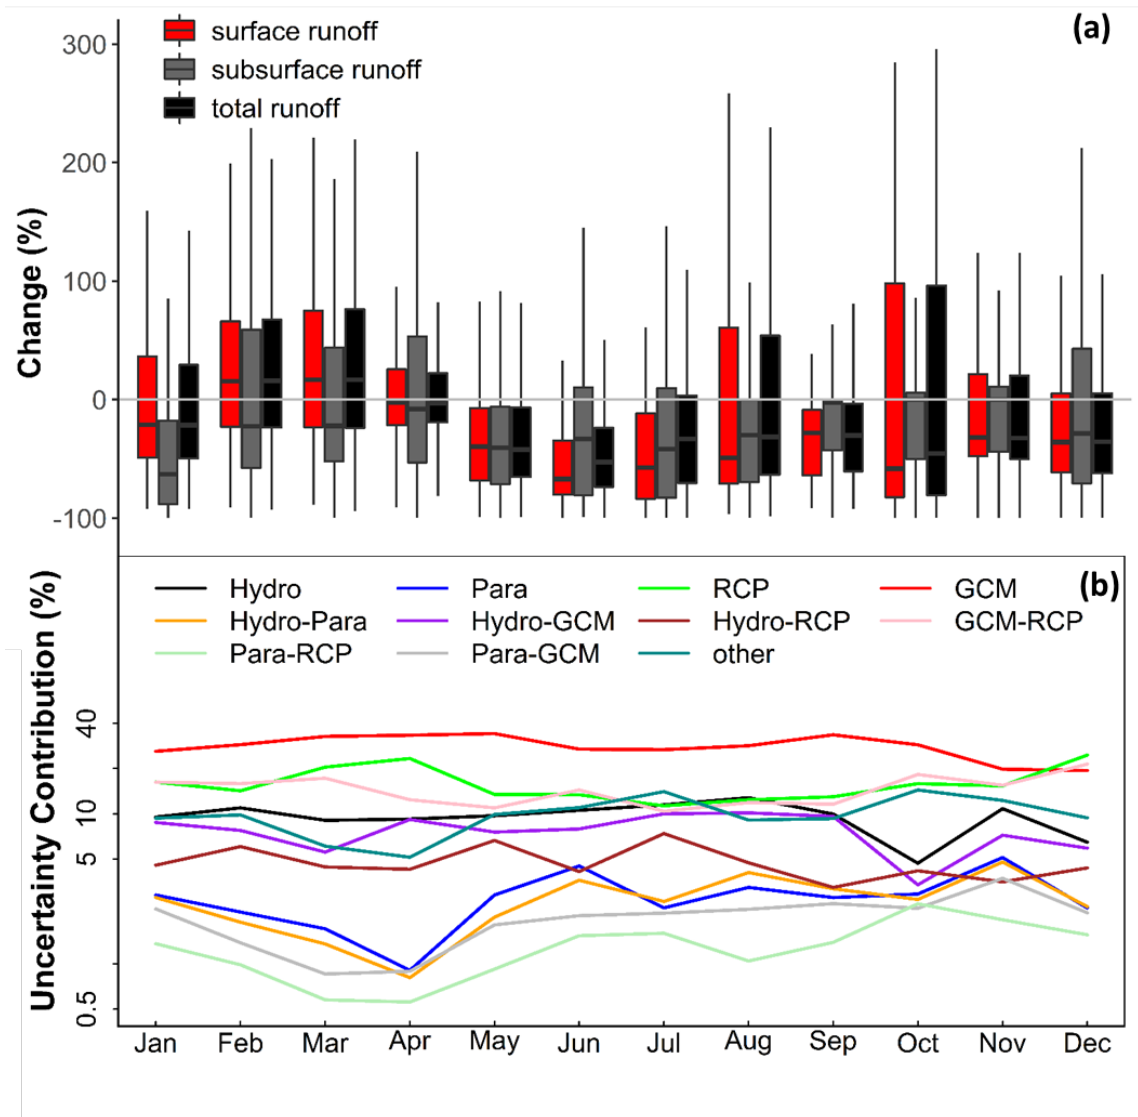

Figure 6: (a) Projected relative changes (%) in monthly surface runoff, subsurface runoff and total runoff in the whole study region during 2081-2100 as compared to historical period (1986-2005); (b) Relative contributions (%) of the uncertainties for the projected changes in the monthly total runoff; Hydro = Hydrologic models; Para = hydrologic model parameters; GCM = General Circulation Models; RCP = Representative concentration pathways (emission scenarios); “other” is the uncertainty from the 3rd and 4th orders of interactions between the 4 major sources (i.e., GCMs, RCPs, Hydrologic models and parameters).

*“The projected changes in monthly runoff (surface, subsurface and total) during 2081-2100 compared to 1986-2005 range between -100% and 300% (Figure 6a). Surface runoff will probably increase in February and March, and decrease in other months (Figure 6a). This is because in the future, the onset of wet season will be delayed and more severe storm events will occur during the shorter wet season (Feng et al., 2019). The decrease in subsurface runoff in all months is probably because the decrease in the frequency (or total number) of storm events (Feng et al., 2019). The changes of monthly total runoff show similar pattern with the surface runoff, suggesting the more pronounced changes in surface runoff as compared to subsurface runoff. The major uncertainty sources are GCM and RCP, which account for ~45% of total uncertainty (Figure 6b). Hydrologic models contribute to ~10% of total uncertainty (Figure 6b). This suggests that the climate patterns (e.g., storm event frequency and intensity) are more important factors controlling the runoff generation than the hydrologic model algorithms.”*

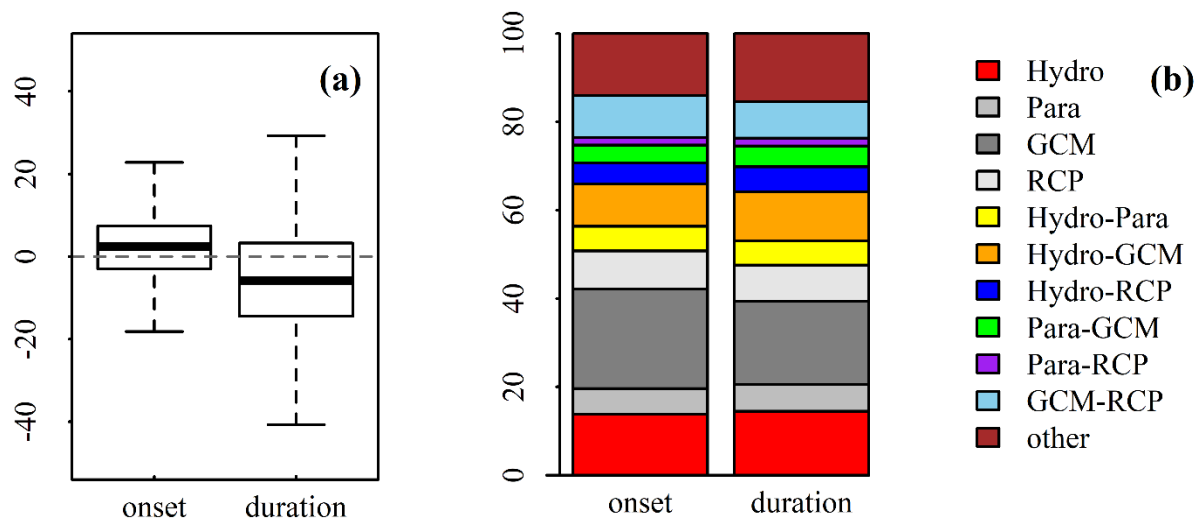

*Figure 9: (a) Projected change (days) in the onset and duration of wet season in SBC; positive (negative) values indicate later (earlier) onset or longer (shorter) duration of the wet season; (b) relative contributions (%) of the uncertainties of the projected changes in seasonality. Hydro = Hydrologic models; Para = hydrologic model parameters; GCM = General Circulation Models; RCP = Representative concentration pathways (emission scenarios); “other” is the uncertainty from the 3rd and 4th orders of interactions between the 4 major sources (i.e., GCMs, RCPs, Hydrologic models and parameters).*

*“Consistent with the work of Feng et al. (2019), this study suggests a delayed onset and shorter duration of wet season (Figure 9a). The median changes show that the wet season will start later by 3 days, and become shorter by ~6 days. The major uncertainty sources for both onset and duration of wet season are GCM (~20%) and hydrologic models (~15%). Different from discharge and runoff, the seasonality shows more uncertainty from hydrological models (15% vs 12%) and model parameters (~6% vs 2%) (Figure 9b). This is because the seasonality integrates the runoff generation, paths and transport processes for both surface and subsurface runoff, which are important for the timing and quantity of simulated discharge.”*

Another potential avenue of analysis could be a deeper understanding of the parameter space. I am skeptical about the finding that parameterizations explained little of the uncertainty since it appeared (from Figure 4) that the values within the different parameter sets evaluated were actually quite similar. Since it appears that you have those parameter sets available, would it be possible to expand the analysis to include more parameter sets? That could buy more confidence in the current analyses.

**Response:** We have modified the parameter sets analysis by implementing more sophisticated parameter selection criteria and selecting more parameter sets. We first selected 4 parameter sets with highest NSE as we did originally, and then we selected another 6 sets of parameters following the procedures: (1) rank the rest parameter sets based on their performance (assessed by NSE); (2) randomly select 6 sets of parameters from the top 20% samples. These 10 parameter sets take both parameter dominance and variability into account. Then they were used for the uncertainty analysis. The associate figure and results have been updated.

*“To quantify the uncertainties from model parameters, we selected 10 parameter sets using the following criteria: (1) select 4 parameter sets with highest NSE based on the calibration results; (2) rank the rest parameter sets based on their performance (i.e., NSE), and randomly select 6 sets from the top 20% candidates. This parameter selection process enabled us to take both parameter dominance and variability into account while maintaining the high model performance, which is important for the uncertainty analysis. These 10 parameter sets were then used for uncertainty analysis.”*

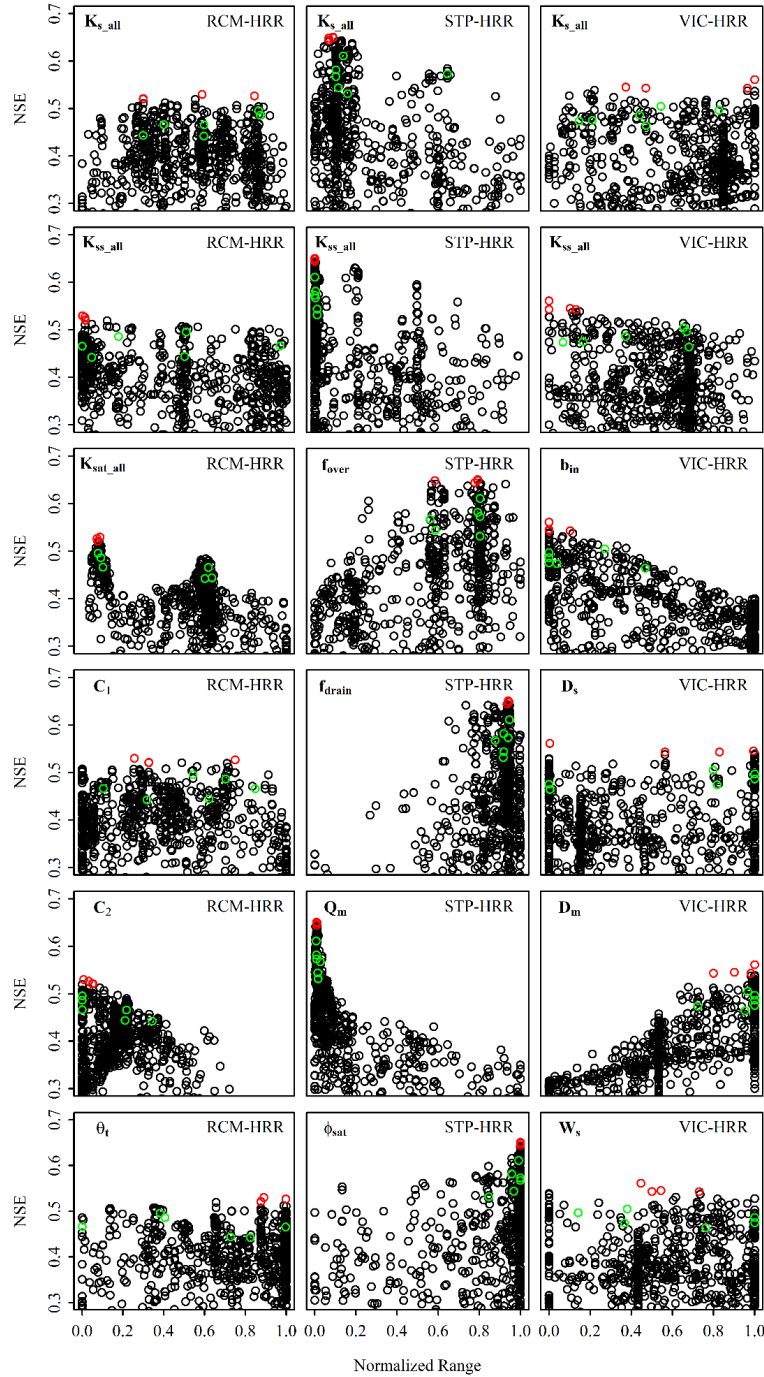

Figure 5: Parameters (black circles) sampled during calibration process and their corresponding performance (assessed by NSE). The red circles indicate the 4 parameter sets with highest NSE values, and the green circles indicate 6 randomly selected parameter sets from the top 20% samples (ranked by NSE). These ten parameter sets were used for uncertainty analysis. In this figure, the parameter values are normalized by their ranges (shown in Table 1), so the range of the x axis is 0-1. The parameters were sampled throughout their whole ranges, however, for clarity, samples with NSE lower than 0.3 are not shown in this figure.

References not included in the current manuscript:

Addor, N., Rössler, O., Köplin, N., Huss, M., Weingartner, R., & Seibert, J. (2014). Robust changes and sources of uncertainty in the projected hydrological regimes of Swiss catchments. *Water Resources Research*, 50(10), 7541–7562. <https://doi.org/10.1002/2014WR015549>

Chegwidden, O. S., Nijssen, B., Rupp, D. E., Arnold, J. R., Clark, M. P., Hamman, J. J., et al. (2019). How do modeling decisions affect the spread among hydrologic climate change projections? Exploring a large ensemble of simulations across a diversity of hydroclimates. *Earth's Future*, 7, 623–637. <https://doi.org/10.1029/2018EF001047>

Hattermann, F. F., Vetter, T., Breuer, L., Su, B., Daggupati, P., Donnelly, C., Krysnova, V. (2018). Sources of uncertainty in hydrological climate impact assessment: A cross-scale study. *Environmental Research Letters*, 13(1). <https://doi.org/10.1088/1748-9326/aa9938>

Environmental Research Letters, 13(1). <https://doi.org/10.1088/1748-9326/aa9938>

Hattermann, F. F., Vetter, T., Breuer, L., Su, B., Daggupati, P., Donnelly, C., Krysnova, V. (2018). Sources of uncertainty in hydrological climate impact assessment: A cross-scale study. *Environmental Research Letters*, 13(1). <https://doi.org/10.1088/1748-9326/aa9938>

Environmental Research Letters, 13(1). <https://doi.org/10.1088/1748-9326/aa9938>

**Response:** They have been inserted to the manuscript in L83-85.

=====

Specific Comments (individual scientific questions/issues):

L14- In the abstract, you mention that identification and uncertainties are rarely studied. This is not true. It is increasingly common (see, for example, the three references above).

**Response:** With that sentence we meant the identification of uncertainties from the hydrological model components (not the whole hydrologic model) is rarely studied. We have modified the sentence as follows:

*“Such assessments are commonly accomplished using outputs from a hydrologic model forced with future precipitation and temperature projections. The algorithms used for the hydrologic model components (e.g., runoff generation) can introduce significant uncertainties in the simulated hydrologic variables. Here, a modeling framework was developed that integrates multiple runoff generation algorithms with a routing model and associated parameter optimizations. This framework is able to identify uncertainties...”*

L139-141 – Is the monthly 1 degree aerosol optical depth product sufficient for calculating radiation at the scale you are working at?

**Response:** The 1 degree aerosol optical depth product was downscaled to 0.05 degree for PET estimation. The following text has been inserted to the manuscript:

*“The aerosol optical depth product was downscaled to 0.05° x 0.05° (Raoufi and Beighley, 2017).”*

L154-156 – Should there be some discussion about the fact that, regardless of subbasin size (which, as the authors state, ranges between 0.1 and 135 km<sup>2</sup>) the parameters are averaged across each subbasin?

**Response:** The “sub-basin” here refers to the model unit, which was indicated in Lines 152-154 *“The sub-basins are irregular-shape catchments defined by the flow accumulation area threshold. In this study, the threshold is 1 km<sup>2</sup>, which means the sub-basins (model units) are in size of roughly 1 km<sup>2</sup>.”* So the watershed with a drainage area of 135 km<sup>2</sup> roughly consists of 135 model units, and the model parameters are averaged over each model unit. For the small watersheds with drainage areas less than 1 km<sup>2</sup>, the model parameters were averaged over each watershed. To clarify it, we have added the following text to the manuscript in L170-172:

*“This indicates these parameters were averaged for each model unit, the majority of which had an area of roughly 1 km<sup>2</sup>, with less than 1% having an area of <1 km<sup>2</sup>.”*

L175-254 – I’m not sure the specificity is necessary for each of the hydrologic models in the main text. I would suggest moving the conceptual plot from the supplemental text to the main text and moving the mathematical explanations to the supplemental text. This would save you space in the main body of the text, improving readability, while letting your story come through easier. With that space you could fill in with more details on the calibration methods.

**Response:** We have moved the text about hydrologic models to the Supporting Information and added a conceptual Figure (Figure 2) to illustrate the framework.

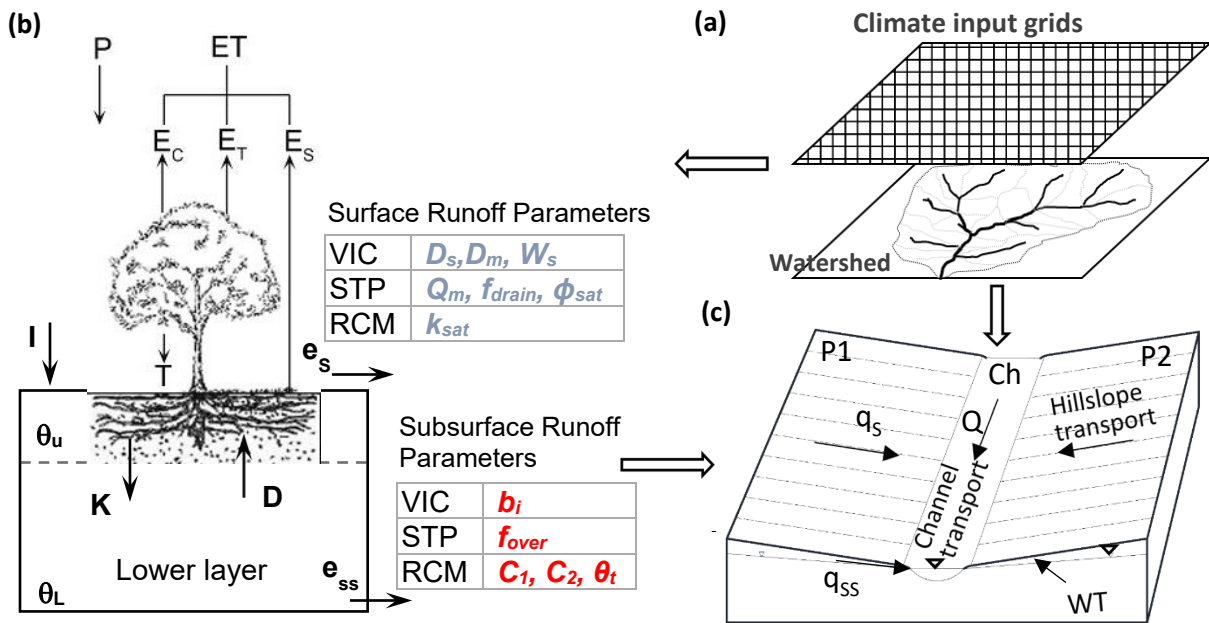

*Figure 2: The conceptual framework about the hydrologic models used in this study. Portions of this figure were adapted from the work of Beighley et al. (2009). (a) shows the grid-based climate inputs for hydrologic models; (b) shows water balance models; P is precipitation; ET is evapotranspiration;  $E_s$  is soil evaporation;  $E_c$  is canopy evaporation;  $E_t$  is transpiration;  $e_s$  is water available for surface runoff;  $e_{ss}$  is water available for subsurface runoff;  $\theta_u$  is relative soil moisture in upper soil layer;  $\theta_L$  is relative soil moisture in lower soil layer; I is infiltration; K is water flux from the upper layer to the lower layer; and D is diffusive water flux from the lower layer to the upper layer; and (c) shows HRR routing model; the “open-book” assumption: two identical planes (P1 and P2) with the channel (Ch) in the center of each sub-basin;  $q_s$  is the surface runoff;  $q_{ss}$  is subsurface runoff; Q is discharge in the river channel, and WT is groundwater table. The parameters in red italic are for surface runoff generation, the parameters in blue italic are for subsurface runoff generation. The first columns in the tables indicate the models that the parameters are used for. The definition of these parameters can be found in the supporting information.*

L260-263 – The definitions of  $K_{ss}$  and  $K_s$  would probably best fit in the description of the routing model since they are from that model.

**Response:** We have move them to the routing model section L204-207.

L268-269 – How are the three different optimal parameter sets selected? Are they very different parameter sets? As in, are they likely to be in very different parts of the overall calibration space/range of parameter values? Or are they likely to be relatively similar? If they are similar, does that explain the less than 1% uncertainty explained by parameterization referenced in L426 in the results? I see in Figure 4 that some of the parameter values for some models are indeed quite similar (e.g. Kss\_all for RCM-HRR). How does this affect your conclusions about the minimal contribution of parameterization toward total uncertainty?

**Response:** We think the reviewer is right that some parameters are quite similar, which explains the small uncertainty contribution. We have modified the parameter selection process by applying the following criteria: (1) select 4 parameter sets with highest NSE based on the calibration results; (2) rank the rest parameter sets based on their performance (i.e., NSE), and randomly select another 6 sets from the top 20% parameter sets. This parameter selection process enabled us to take both parameter dominance and variability into account while maintaining the high model performance. The results with these 10 parameter sets show that for changes in runoff and discharge, the hydrologic model parameters contribute about 2% to the total uncertainty, and for changes in seasonality (onset and duration of wet season), the parameters can contribute about 6% of the total uncertainty. The associated figures (Figures 5-9) and text (section 3.2) have been updated.

L320-324 – Do the authors conduct their performance weighting based upon the GCM simulations? Or do they do it using the historical meteorological forcing data (in this case Livneh et al)? The latter would be appropriate, since the former would not match the actual weather experienced by the region.

**Response:** We did the performance weighting on the simulations from the GCMs+HydroModels+Parameters combinations, because we need to assess their performance in representing historical reality and then assign weights to them. The reviewer is right that the GCMs don't match the actual weather. To deal with this issue, we ranked the simulated discharge variable series (e.g., annual mean discharge or annual peak discharge) from each GCMs+HydroModels+Parameters simulation, and then compare them with the observations (also ranked). The details of this process have been provided in the Supporting Information.

*“In this study, the annual mean discharge and annual maximum daily discharge are the considered variables. Since these two variables are not normally distributed, a Box-Cox transformation is performed before applying the EM method. Considering the GCMs' predictions are not temporally consistent with reality (i.e., the GCMs' prediction does not have correct timing), the observation and simulation are both ranked from high to low, and then  $l(\theta)$  is maximized based on the ranked series. The procedure is as follows:*

**Step I:** Calculate the observed annual mean discharge (or annual maximum daily discharge) at each watershed of interest for the period 1986-2005

**Step II:** Calculate the simulated annual mean discharge (or annual maximum daily discharge) for each simulation in the ensemble ( $3 \times 10 \times 10 = 300$  models) for the same period

**Step III:** Rank the observed and simulated annual mean discharge (or annual maximum daily discharge) in a descending order



*Step IV: Calculate the Box–Cox coefficient  $\lambda$  for each watershed by using the `BoxCox.lambda` function in R and transform the quantities by using Eq. S28:*

$$z_t = \frac{y_t^\lambda - 1}{\lambda} \quad (S28)$$

*Step V: Apply the EM process to the transformed series  $z_t$  and estimate the weights and variance of all models*

*Step VI: Calculate the probability of estimated changes in  $Q_m$ ,  $Q_p$  and  $Q_{100}$  in the future (2081-2100) relative to 1986-2005 using the weights obtained in Step V.”*

L360-363 – Is the climate data, even though it was downscaled to the 1/16th degree scale, appropriate for the scale of the subbasins the authors are evaluating (for instance the basin that is only 0.1 km<sup>2</sup>)? As the authors suggest in L360-363, they note substantial biases in the precipitation that, in one example case, doesn't even provide enough water to account for streamflow in absence of ET. Did the authors modify precipitation at all to account for this? If not, do the authors think that some other modification of the precipitation forcing would be appropriate? Also, in Figure 2 caption: (a) what does “normalized calibration process” mean?

**Response:** We do think the 1/16<sup>th</sup> degree precipitation is too coarse for the 0.1 km<sup>2</sup> watershed. However, in this study region, such small basins only account for a small fraction of the total area (<1%). We were aware of this issue, so in this study we mainly focused on the results for the major watersheds (area>7 km<sup>2</sup>) which account for 83% of the total area (Figure 7). In terms of the precipitation scale, we didn't make modifications to it. However, we do think it is a good point that merits further research efforts. In Figure 2 caption, the “normalized calibration process” means the x-axis range (i.e., 0-1) is normalized by the number of iterations during calibration. The termination of the calibration process is determined by an increment threshold (i.e., the improvement step in NSE), so the numbers of calibrations runs among models are slightly different. For example, for Mission Creek watershed (USGS gauge NO. 11119750), the numbers of calibration iterations for these three hydrologic models were 1494, 1460 and 1518, respectively. To normalize these numbers to the range of 0-1 for a better presentation, we divided them by 1494, 1460 and 1518, respectively. The following text has been inserted to the Fig.3 caption:

*“the “normalized calibration process” means the x axis range is normalized by the number of iterations during calibration”*

L437-438 – “Changes in  $Q_m$ ,  $Q_p$  and  $Q_{100}$  are higher under RCP 8.5, but the uncertainties are also higher (Fig. 8), which suggests the uncertainties from RCPs are mainly introduced by RCP 8.5.” Could you clarify this statement? I think there may be some conflation in the sources of the uncertainties in this argument. In looking at Figure 8, we see that the distributions are very different between RCP45 and RCP85. However, in your ANOVA formulation, the comparison of the different model choices really just looks at the differences in the means. Thus, attributing the uncertainty to RCP 8.5 can't be made by these figures alone, since you are only comparing two choices. If you are referring to the large standard deviation of the RCP85 distribution, then

that uncertainty contribution would actually be a higher-order interaction of RCP and something else (perhaps GCM?).

**Response:** We think the reviewer is right. We have modified this sentence to the following:

*“Changes in  $Q_m$ ,  $Q_p$  and  $Q_{100}$  are higher under RCP 8.5, but the uncertainties are also higher (Figure 8), which suggests the higher contribution of RCP 8.5 in the uncertainties of higher-order interactions between RCP and other factors (i.e., GCM, hydrologic model and parameters).”*

L394-396 – I assume the reference to the National Land Data Assimilation System VIC model set-up is the one referenced at the following DOI?

(<https://doi.org/10.5067/ELBDAPAKNGJ9>) If so, it needs a citation and perhaps some explanation as to why this is used as a suitable comparison.

**Response:** Thanks for this information. We have added the reference in the text. We also have inserted the following text to explain the reason for selecting the NLDAS-VIC model outputs as a comparison in L333-338.

*“The NLDAS-VIC runoff simulations are from the same runoff generation model (i.e., VIC) as used in this work, and have compatible spatial/temporal resolutions to those in this study, which makes it a suitable reference for comparison.”*

L446-449/456-457 – How can you justify that model configurations (e.g. irregular catchments or routing schemes) are the reason that hydrologic models played a smaller role in your uncertainty findings?

**Response:** We have modified the text as follows:

*“Compared to previous studies (e.g., Vetter et al. (2015), Schewe et al. (2014), Hagemann et al. (2013); Troin et al., (2018), and Asadieh and Krakauer (2017)), this work identifies relatively low uncertainty contributions from hydrologic models. The main reason for this is that the hydrologic model uncertainty in this study was only from runoff generation algorithms and associated parameters. As is, the three hydrologic models share common algorithms for ET and plane/channel routing, and the same model configuration (e.g., soil matrix and model unit definition). These similarities among models likely reduced the differences in simulated runoff and discharge. In addition, the uniform calibration approach and parameter selection criteria were also likely to eliminate user/method bias which is common in studies that consider more than one hydrologic model. In contrast, the hydrologic models used in previous studies have their own model configurations, and ET and routing algorithms. For example, the VIC model (here VIC refers to the original VIC model, and is different from the model used in this study; to clarify, in following text, VIC refers to the original VIC model while VIC-HRR refers to the model used in this study) applies an ET algorithm different from the one used in this study (Raoufi and Beighley, 2017), uses the grid-based model units ignoring the spatial arrangement, and has its own routing scheme which adopts the synthetic unit hydrograph concept. These differences between models likely resulted in the larger uncertainties in the simulation from hydrologic models in previous studies.”*

L449-451 – What do the authors mean by “a common calibration approach is also used to eliminate user/method bias”?

**Response:** In this study, we performed the same calibration procedure for all hydrologic models including the same multi-objective optimization algorithm and the same final parameter selection criteria. Compared to the scenarios when different calibration processes and final parameter selection standards are applied, the calibration approach in this study may possibly generate a more consistent result. *To make it clear, we have modified the sentence to:*

*“...the uniform calibration approach and parameter selection criteria were also likely to eliminate user/method bias which is common in studies that consider more than one hydrologic model.”*

L461-462 – Is reducing the uncertainty the goal for an impacts assessment? Would not the goal actually be to reveal the uncertainty present, and thus actually focus on multiple hydrologic models as the authors suggest that their selection accounts for a sizeable portion of the uncertainty space?

**Response:** The uncertainty induced by hydrologic models is due to their limited capability in representing the hydrological processes in reality. We have multiple options for hydrologic models. Therefore, it is necessary to quantify the uncertainty caused by the hydrologic model choice, which is one of the main objectives in this study. On the other hand, the performance of different hydrologic models are not the same, at least for the study region. For example, the results in this study showed that STP performs better than the other methods. This implies we need to treat these models differently. This is another objective of this study: evaluate and compare the performance of hydrologic models with different approaches representing runoff generation process. To make the statement more appropriate, we have modified the text as below:

*“This study can also provide useful information for selecting hydrologic models for climate change impact analysis. As discussed in section 3.1, the STP-HRR model is more suitable than the other two models for the study region, mainly due to its ability to represent the non-linear hydrological response to precipitation forcings. This implies hydrologic models adopting the saturation excess runoff generation algorithms may be more suitable for areas with a Mediterranean climate. The uncertainties from hydrologic models are larger than those from the hydrologic model parameters for all hydrologic variables (e.g., discharge, runoff and seasonality), suggesting the inter-model variability is larger than the intra-model variability (from model parameters). This implies that model selection is more important than the parameter selection, and that the parameter equifinality (or non-uniqueness) is less of a concern when quantifying climate change impacts on hydrologic fluxes when using an ensemble of GCM forcings.”*

L471-475 – At the relatively small scale which you are working, how is routing impactful?

**Response:** We think the reviewer is right that the routing for small basins can be not very impactful. We have modified it to the following:

*“In this study, only the runoff generation algorithm was investigated. Other hydrologic model components, such as ET algorithm and routing method, also have many variants. The choice of these components can also make a difference in the total uncertainties in simulated runoff and*

*streamflow. Therefore, further study integrating different algorithms for these components can be conducted in the future...*

L483 – How do you define uncertainty of 230%? Is that the range? Or +/- 2 standard deviations? etc):

**Response:** *The uncertainty was defined as the range, that is, max change - min change. To clarify this, we have added the following text:*

*“(here, uncertainty refers to the range of predicted relative changes among models, that is, from -100% to +220%)”*

L69-70, L81 – Confusing sentences/phrasing

**Response:** *We have modified the sentence in L69-70 to “Model parameter selections based on calibration metrics can result in different optimal parameter values (i.e., parameter equifinality).”*

*We have modified the sentence in L81 to “Most previous studies treated hydrologic models as a whole package.”*

=====

Technical Corrections (typing errors, etc.)

L43 – “cause” not “causes”

L220 – “matric” not “metric” – there are many other language typos (e.g. L222 “expresses” should be “expressed”) sprinkled throughout the text, but I imagine that with another read-through these issues could be resolved.

Overall, there are small language errors throughout the manuscript which the vast majority of the time don’t interfere with understanding but are somewhat distracting. A careful reading would help resolve these.

**Response:** *Thanks for pointing them out. A careful proofreading has been made to correct them.*
